# Supplementary material for: Astrocytes modulate sensory-evoked neuronal network activity
Source: PubMed Central journal article supplement (PMC7378834; doi:10.1038/s41467-020-17536-3), 2020-07-23
Supplement: 41467_2020_17536_MOESM1_ESM.pdf [file 41467_2020_17536_MOESM1_ESM.pdf]

Supplementary Information for:

“Astrocytes modulate sensory-evoked neuronal network activity”

Lines et al.

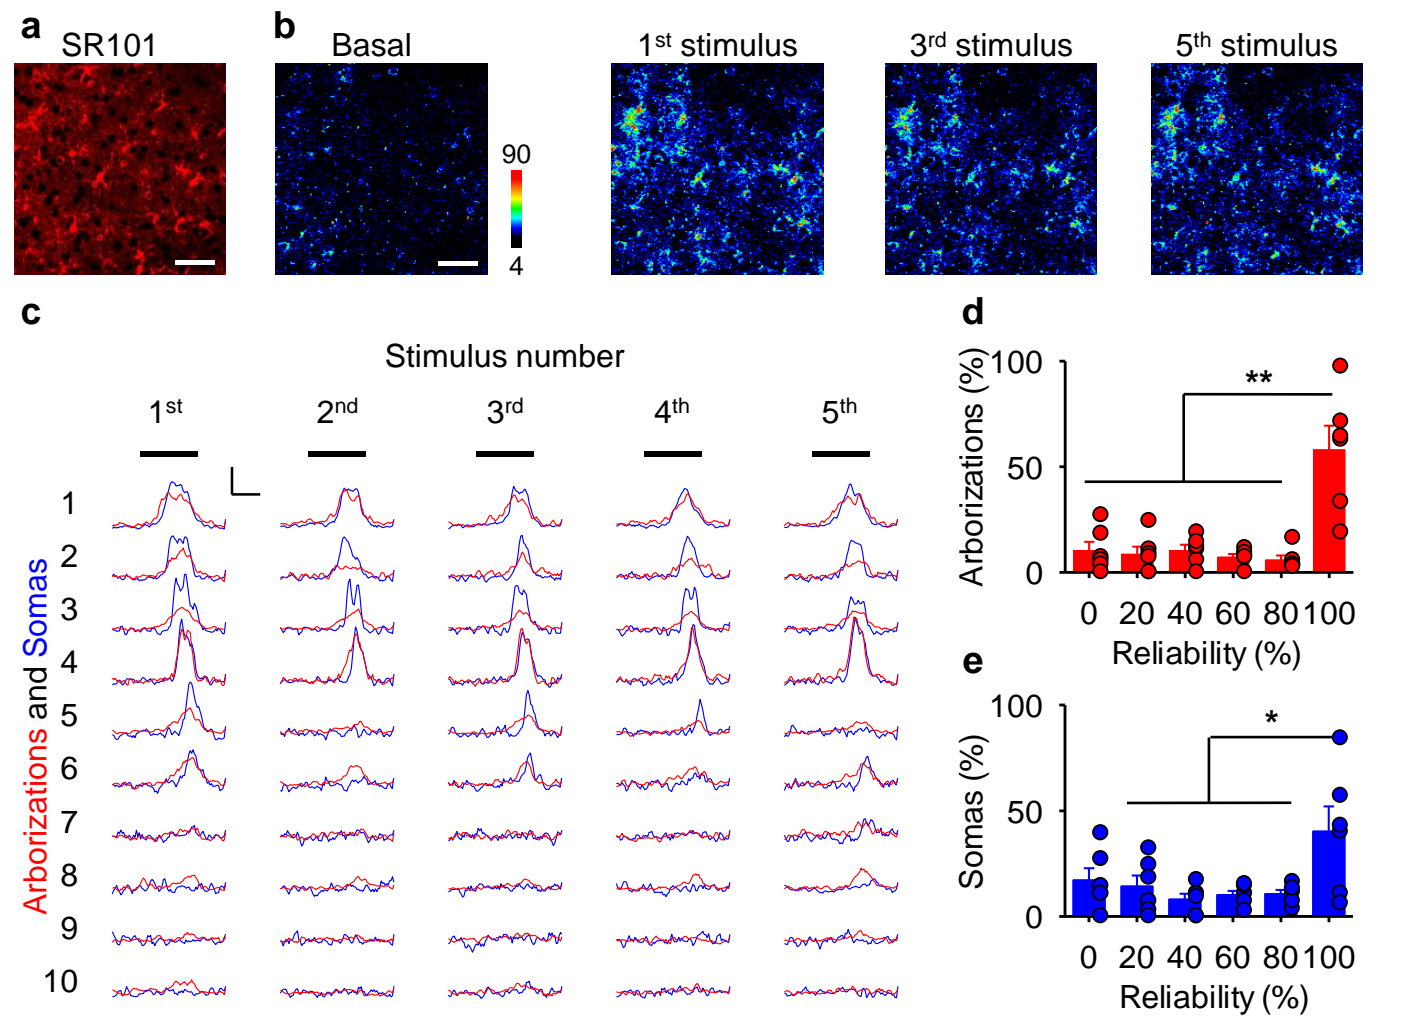

**Supplementary Fig. 1** Astrocyte population responses to sensory stimulation are reliable. **a** SR101 staining. Scale bar = 50  $\mu$ m. **b** Pseudocolor  $\text{Ca}^{2+}$  image of basal during the 1<sup>st</sup>, 3<sup>rd</sup> and 5<sup>th</sup> hind-paw stimulus. Scale bar = 50  $\mu$ m. **c** Soma (blue) and arborization (red)  $\text{Ca}^{2+}$  traces in response to 5 repeated stimuli. Scale =  $F/F_0$ , 10 s. Images and traces are representative of data obtained independently across 3 mice. **d** Astrocyte arborizations reliability, quantified as the proportion of successful responses to 5 stimuli (1-way ANOVA:  $p = 4.02e^{-7}$ ; Tukey HSD:  $p < 1.1e^{-5}$ ;  $n = 6$  populations, 3 animals). **e** Astrocyte somas reliability (1-way ANOVA:  $p = 0.007$ ; Tukey HSD:  $p < 0.047$ ;  $n = 6$  populations, 3 animals). Means  $\pm$  SEM, ‘\*’:  $p < 0.05$  and ‘\*\*\*’:  $p < 0.01$  Tukey HSD after significant 1-way ANOVA. Source data are provided as a Source Data file.

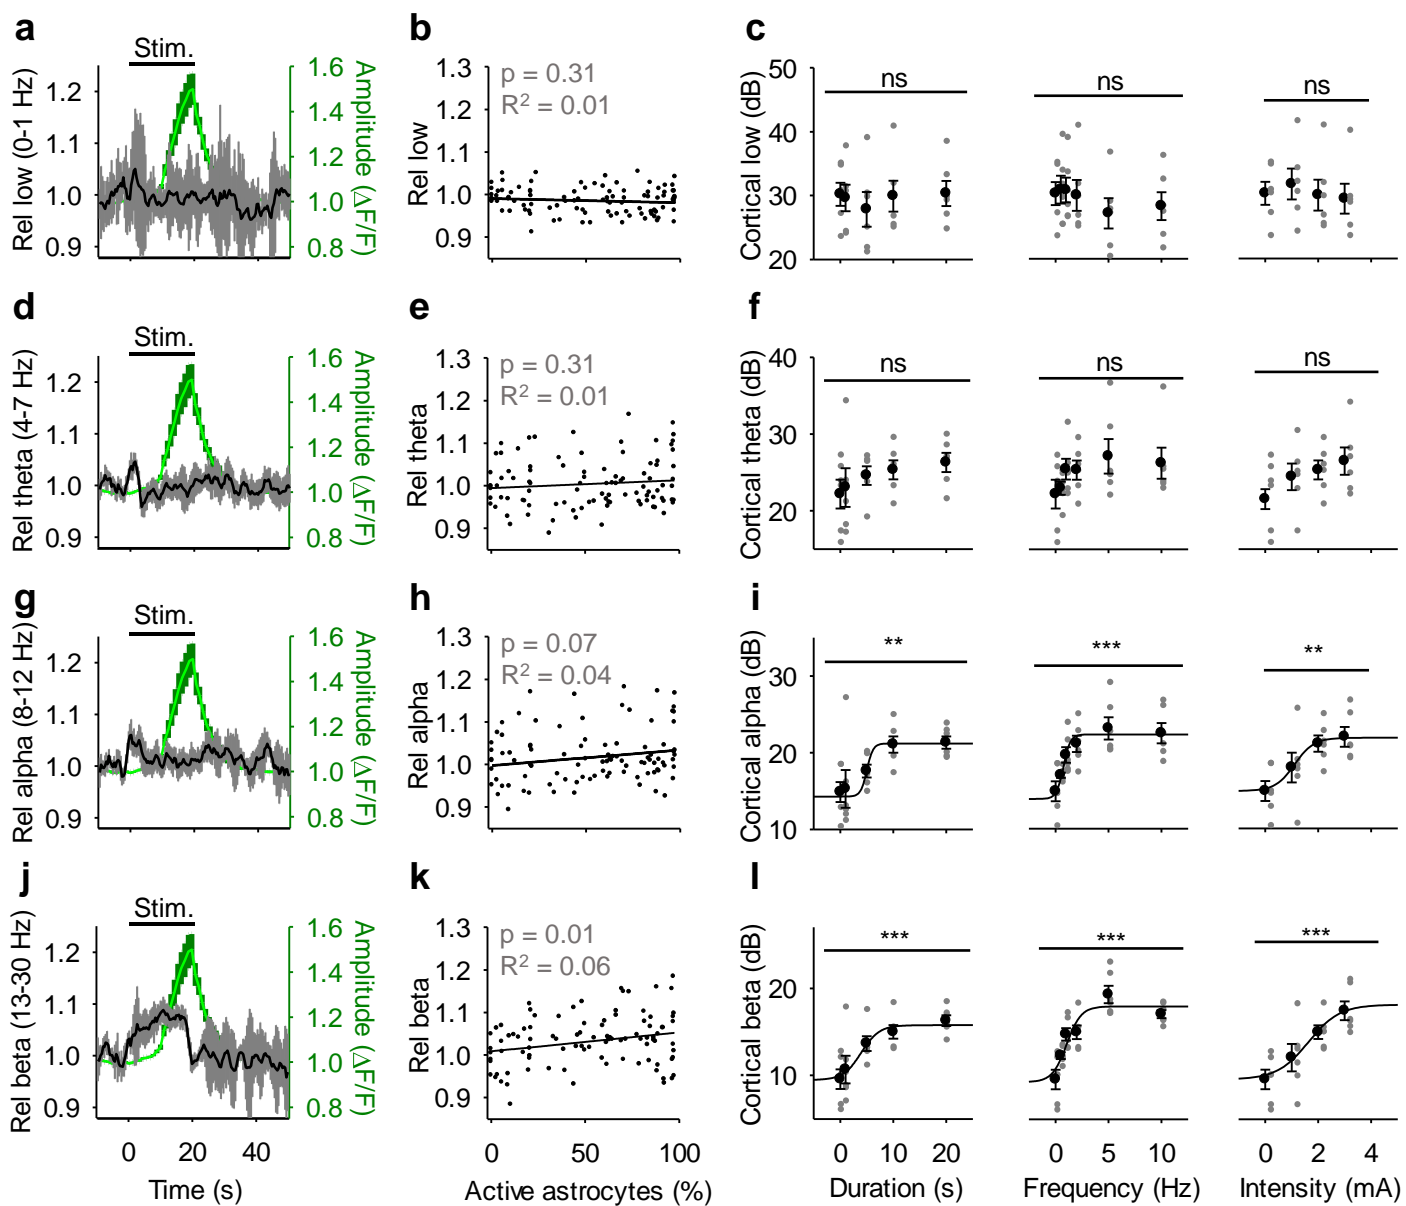

**Supplementary Fig. 2** Cortical astrocyte activity co-occurs with increases in ECoG signatures of neuronal network activity during sensory stimulation. **a** Astrocyte  $\text{Ca}^{2+}$  levels (green) and relative low ECoG frequencies (0-1 Hz; black) vs. time. Lines and shadows represent mean and SEM, respectively, as in other panels. **b** Relative cortical low ECoG frequencies vs. percentage of active astrocytes. Data were fitted to a linear regression with  $p$  and  $R^2$  values as indicated. **c** Steady-state cortical low ECoG frequencies vs. the duration ( $D$ ; left;  $p = 0.93$ ; 1-way ANOVA;  $n = 6$  animals), frequency ( $F$ ; center;  $p = 0.78$ ) and intensity ( $I$ ; right;  $p = 0.90$ ) of the sensory stimulation. **d - f** as **a - c** but for cortical theta frequency (4-7 Hz) (duration:  $p = 0.43$ , frequency:  $p = 0.28$ , intensity:  $p = 0.33$ ). **g - i** as **a - c** for cortical alpha frequency (8-12 Hz) (duration:  $p = 0.006$ , frequency:  $p = 0.00007$ , intensity:  $p = 0.009$ ). **j - l** as **a - c** for cortical beta frequency (13-30 Hz) (duration:  $p = 0.0004$ , frequency:  $p = 1.5 \times 10^{-8}$ , intensity:  $p = 0.0007$ ). In **i** and **l**, data were fit to the sigmoid function in equation [2] (Methods; see Supplementary Table 1 for fitting parameters). Mean  $\pm$  SEM. 'ns':  $p > 0.05$ , '\*\*':  $p < 0.01$ , and '\*\*\*':  $p < 0.001$  using 1-way ANOVA. Source data are provided as a Source Data file.

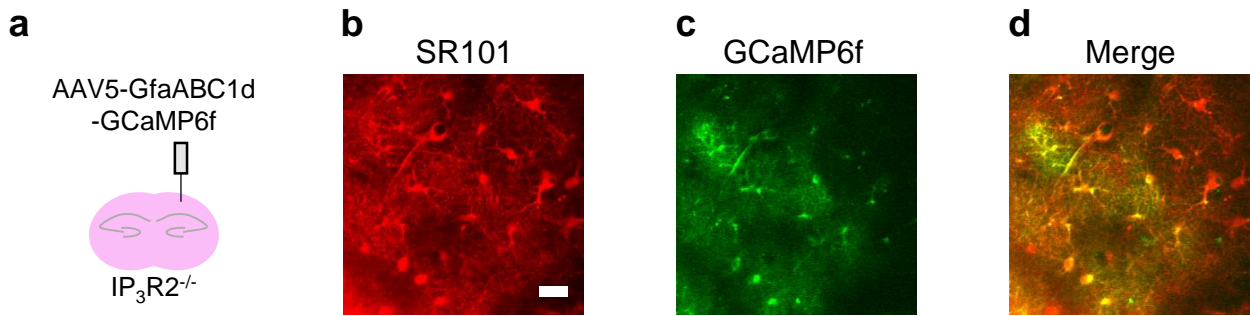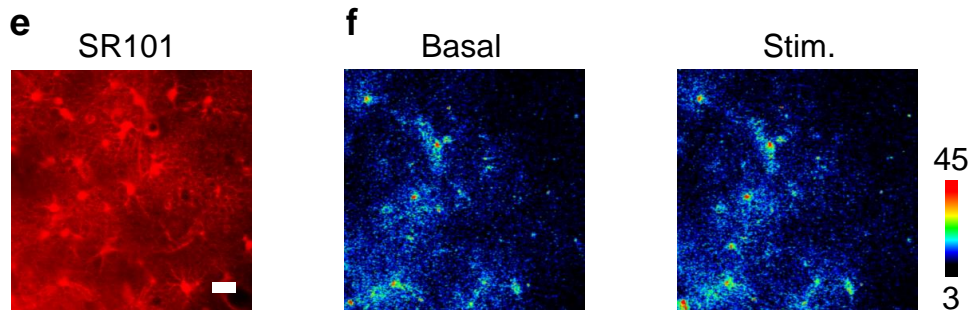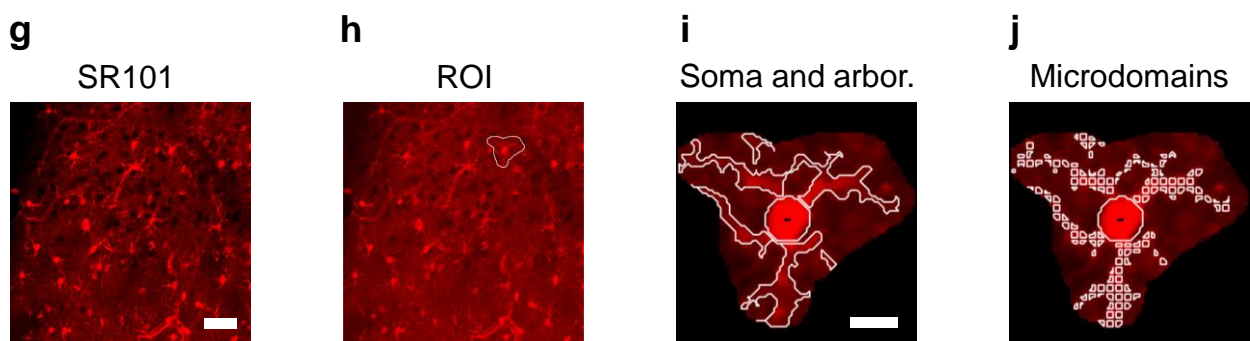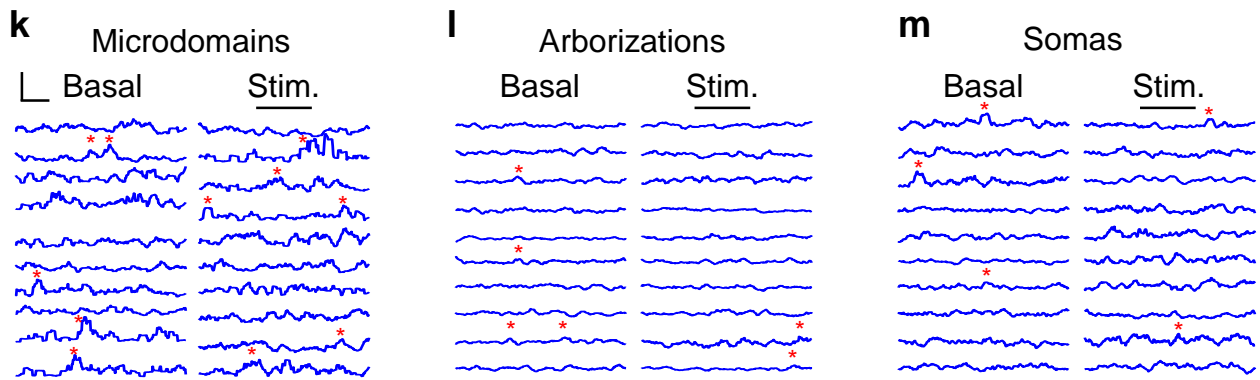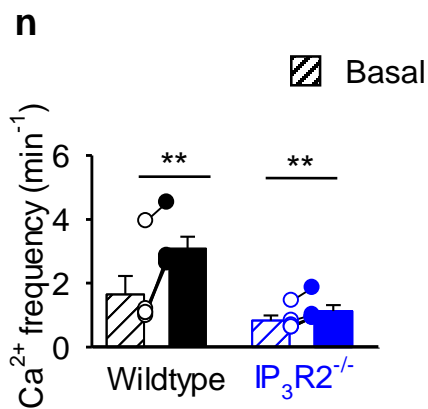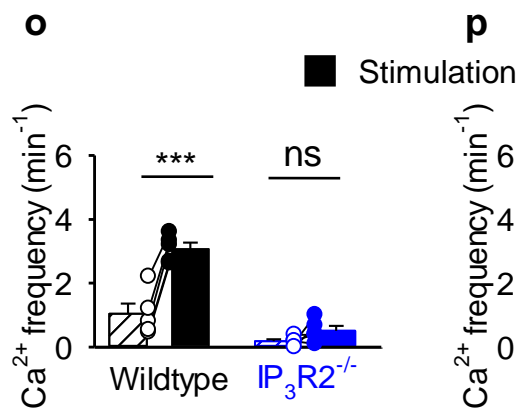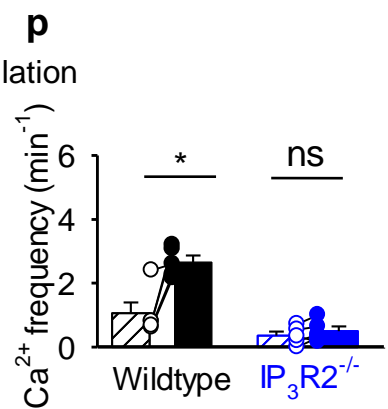

**Supplementary Fig. 3** Astrocyte calcium signaling is impaired in  $IP_3R2^{-/-}$  mice. **a** Scheme of viral injections (AAV5-GfaABC1d-GCaMP6f) into the S1 cortex of  $IP_3R2^{-/-}$  mice. **b** SR101 stained astrocytes. Scale bar = 20  $\mu\text{m}$ . **c** GCaMP6f virus infected astrocytes. **d** Merge of SR101 and GCaMP6f images. **e** SR101 stained astrocytes. Scale bar = 20  $\mu\text{m}$ . **f** Pseudocolor  $\text{Ca}^{2+}$  images during basal and sensory stimulation. **g** SR101 of astrocytes. Scale bar = 50  $\mu\text{m}$ . **h** Example of selected astrocyte (white outline). **i** Soma and arborization segmentation obtained with Calsee program. Scale bar = 10  $\mu\text{m}$ . **j** Discretized microdomains obtained with Calsee program. **k** Calcium traces of subcellular microdomains during basal and sensory stimulation in  $IP_3R2^{-/-}$  mice. Red asterisks indicate detected  $\text{Ca}^{2+}$  events. Scale =  $F/F_o$ , 10 s. **l** as k, but for astrocyte arborizations. **m** as k, but for astrocyte somas. **n** Frequency of  $\text{Ca}^{2+}$  events during basal (hashed) and stimulated (filled) in microdomains in wildtype (black;  $p = 0.003$ ; paired t-test;  $n = 5$  imaging planes from 2 animals) and  $IP_3R2^{-/-}$  (blue;  $p = 0.0013$ ; paired t-test;  $n = 5$  imaging planes from 2 animals) mice. **o** as n, but for astrocyte arborizations (WT:  $p = 0.0002$ ; KO:  $p = 0.15$ ). **p** as n, but for astrocyte somas (WT:  $p = 0.01$ ; KO:  $p = 0.17$ ). Mean  $\pm$  SEM. 'ns':  $p > 0.05$ , '\*':  $p < 0.05$ , '\*\*':  $p < 0.01$ , and '\*\*\*':  $p < 0.001$  using two-sided paired student t-test. Images and traces are representative of data obtained independently across 2 mice. Source data are provided as a Source Data file.

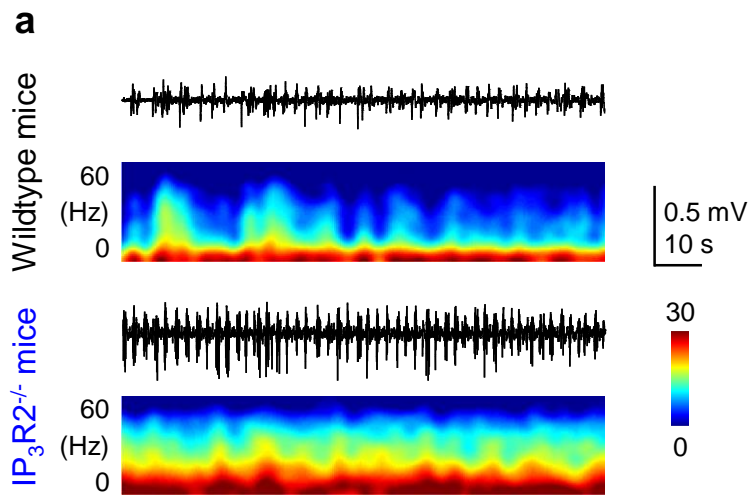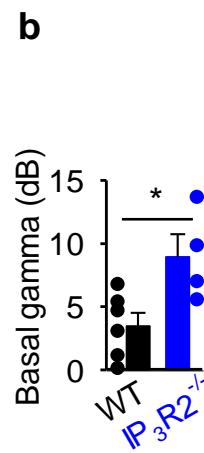

**Supplemental Fig. 4** Basal cortical gamma is heightened in  $IP_3R2^{-/-}$  mice. **a** Basal extracellular recordings and spectrograms from wildtype (top) and  $IP_3R2^{-/-}$  (bottom) mice. Traces are representative of data from independent experiments from 4 mice. **b** Basal gamma activity from wildtype (black) and  $IP_3R2^{-/-}$  (blue) mice ( $p = 0.02$ ; two sample t-test;  $n = 6$  WT and 4 KO animals). Mean  $\pm$  SEM. ‘\*’:  $p < 0.05$  using two-tailed student t-test. Source data are provided as a Source Data file.

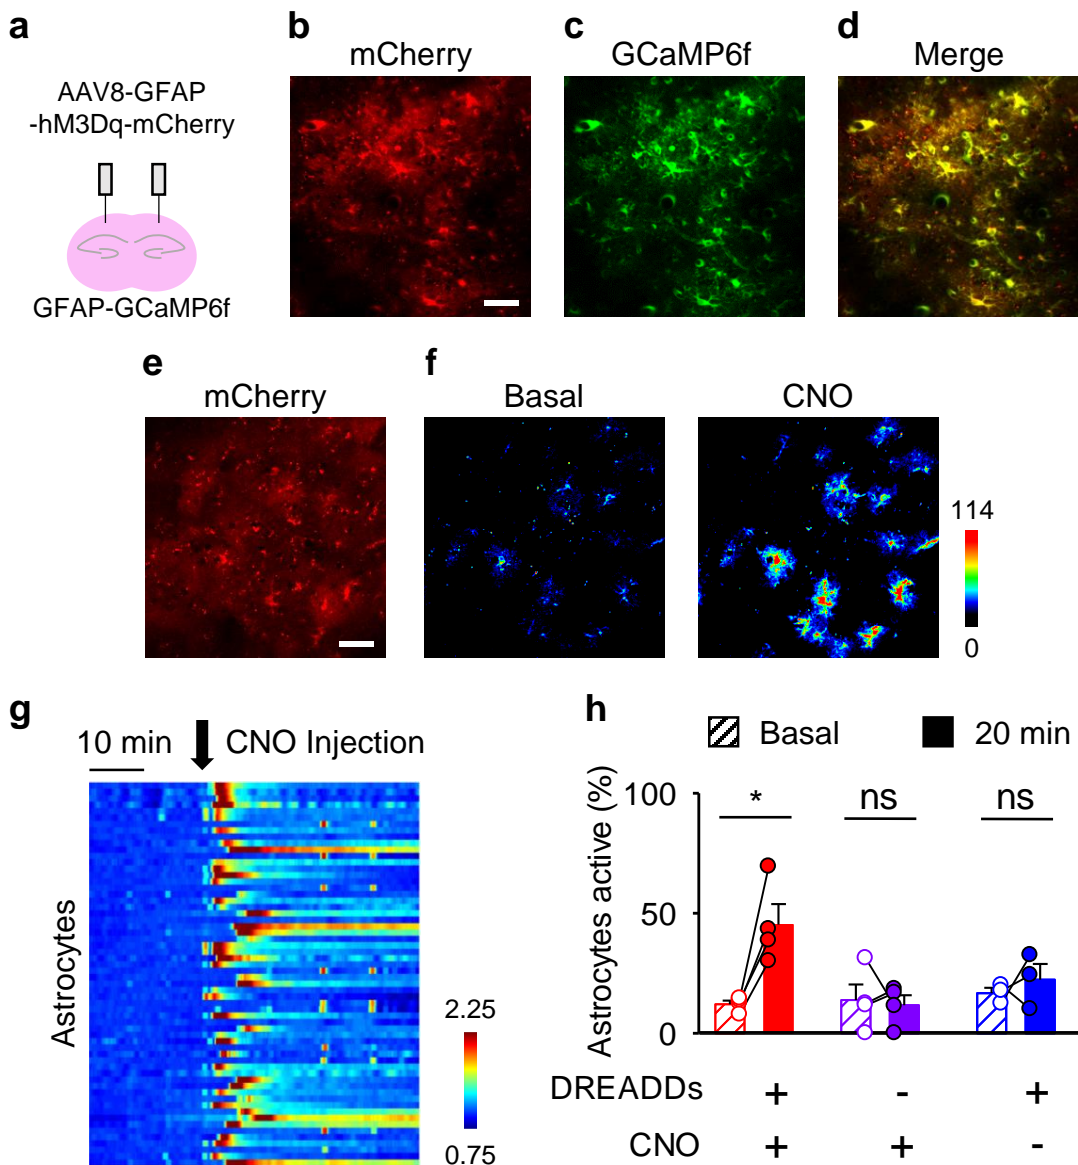

**Supplementary Fig. 5** Intraperitoneal injection of Clozapine N-Oxide activates DREADDs expressing astrocytes in vivo. **a** Scheme of bilateral viral injections of either DREADDs (AAV8-GFAP-hM3Dq-mCherry) or control (AAV8-GFAP-mCherry) viral vectors. **b** mCherry expression in S1. Scale bar = 50  $\mu$ m. **c** GCaMP6f expression in S1. **d** Merge of **b** and **c**. **e** mCherry expression in S1. Scale bar = 50  $\mu$ m. **f** Pseudocolor  $\text{Ca}^{2+}$  images of astrocyte activity during basal and after CNO injection. Example images are representative of independent data gathered from 4 mice. **g** A total of 60 astrocytes responding to DREADDs activation from 4 different mice. **h** Active astrocytes before (hashed) and 20 minutes after (filled) injections of astrocytes expressing DREADDs with CNO (red:  $p = 0.02$ ; paired t-test;  $n = 4$  mice), mCherry with CNO (purple;  $p = 0.58$ ;  $n = 4$  mice), and DREADDs with saline (blue;  $p = 0.73$ ;  $n = 3$  mice). Mean  $\pm$  SEM. 'ns':  $p > 0.05$  and '\*':  $p < 0.05$  using two-sided paired student t-test. Source data are provided as a Source Data file.

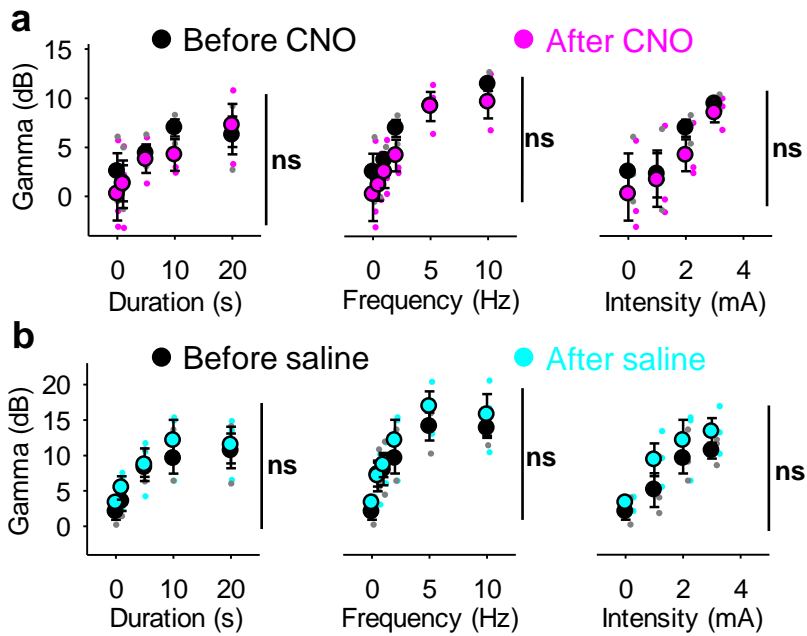

**Supplementary Fig. 6** Introducing CNO or surgery does not modulate cortical neuronal network response to sensory stimulation. **a** Cortical gamma in response to sensory stimulation before (black) and after (magenta) intraperitoneal injection of CNO into control virus infected animals (2-way ANOVAs for CNO: duration:  $p = 0.43$ ; frequency:  $p = 0.10$ ; intensity:  $p = 0.24$ ;  $n = 3$  animals). **b** Cortical gamma in response to sensory stimulation before (black) and after (cyan) intraperitoneal injection of saline into DREADDs infected animals (2-way ANOVAs for saline: duration:  $p = 0.27$ ; frequency:  $p = 0.21$ ; intensity:  $p = 0.07$ ;  $n = 3$  animals). Mean  $\pm$  SEM. 'ns':  $p > 0.05$  for 2-way ANOVA. Source data are provided as a Source Data file.



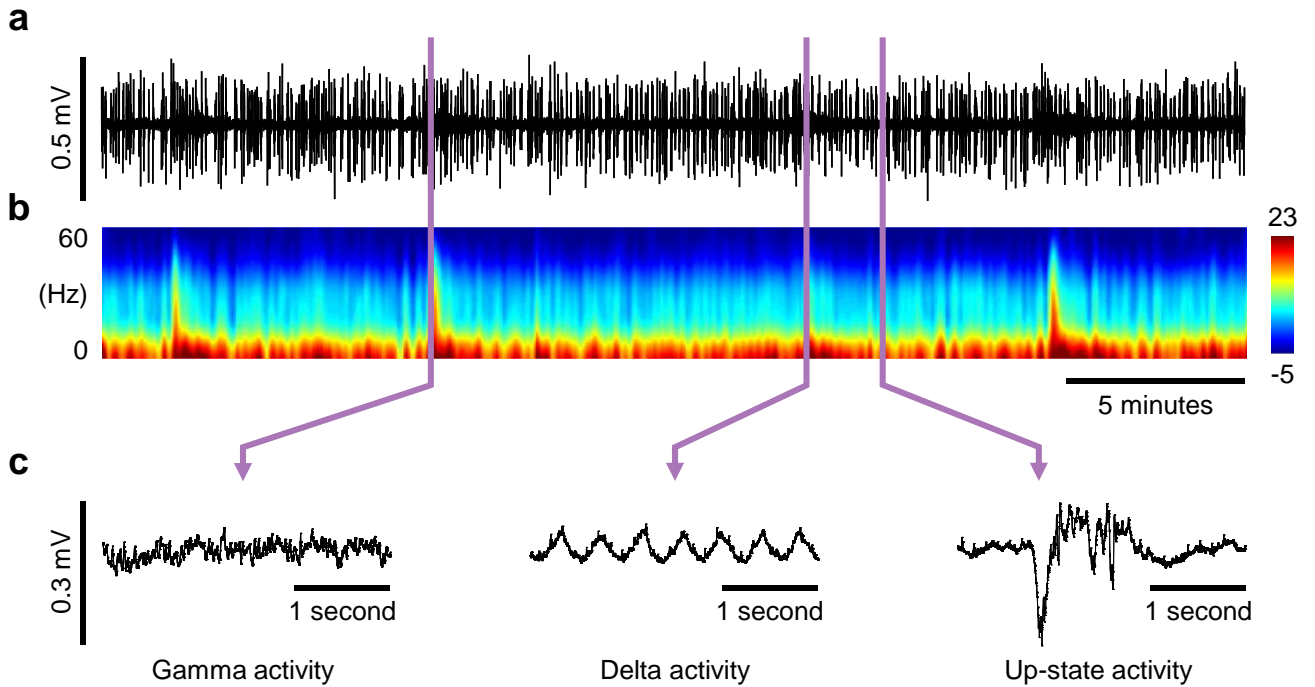

**Supplementary Fig. 7** Stability of ECoG signatures in the primary somatosensory cortex in vivo. **a** Raw ECoG signal monitoring basal activity in S1 ( $-1_{a-p}$ ,  $1.5_{m-l}$ ). **b** Spectrogram of frequency content in the ECoG. **c** Expanded traces showing distinct cortical activity in basal recordings: gamma activity, delta activity, and Up-state activity.

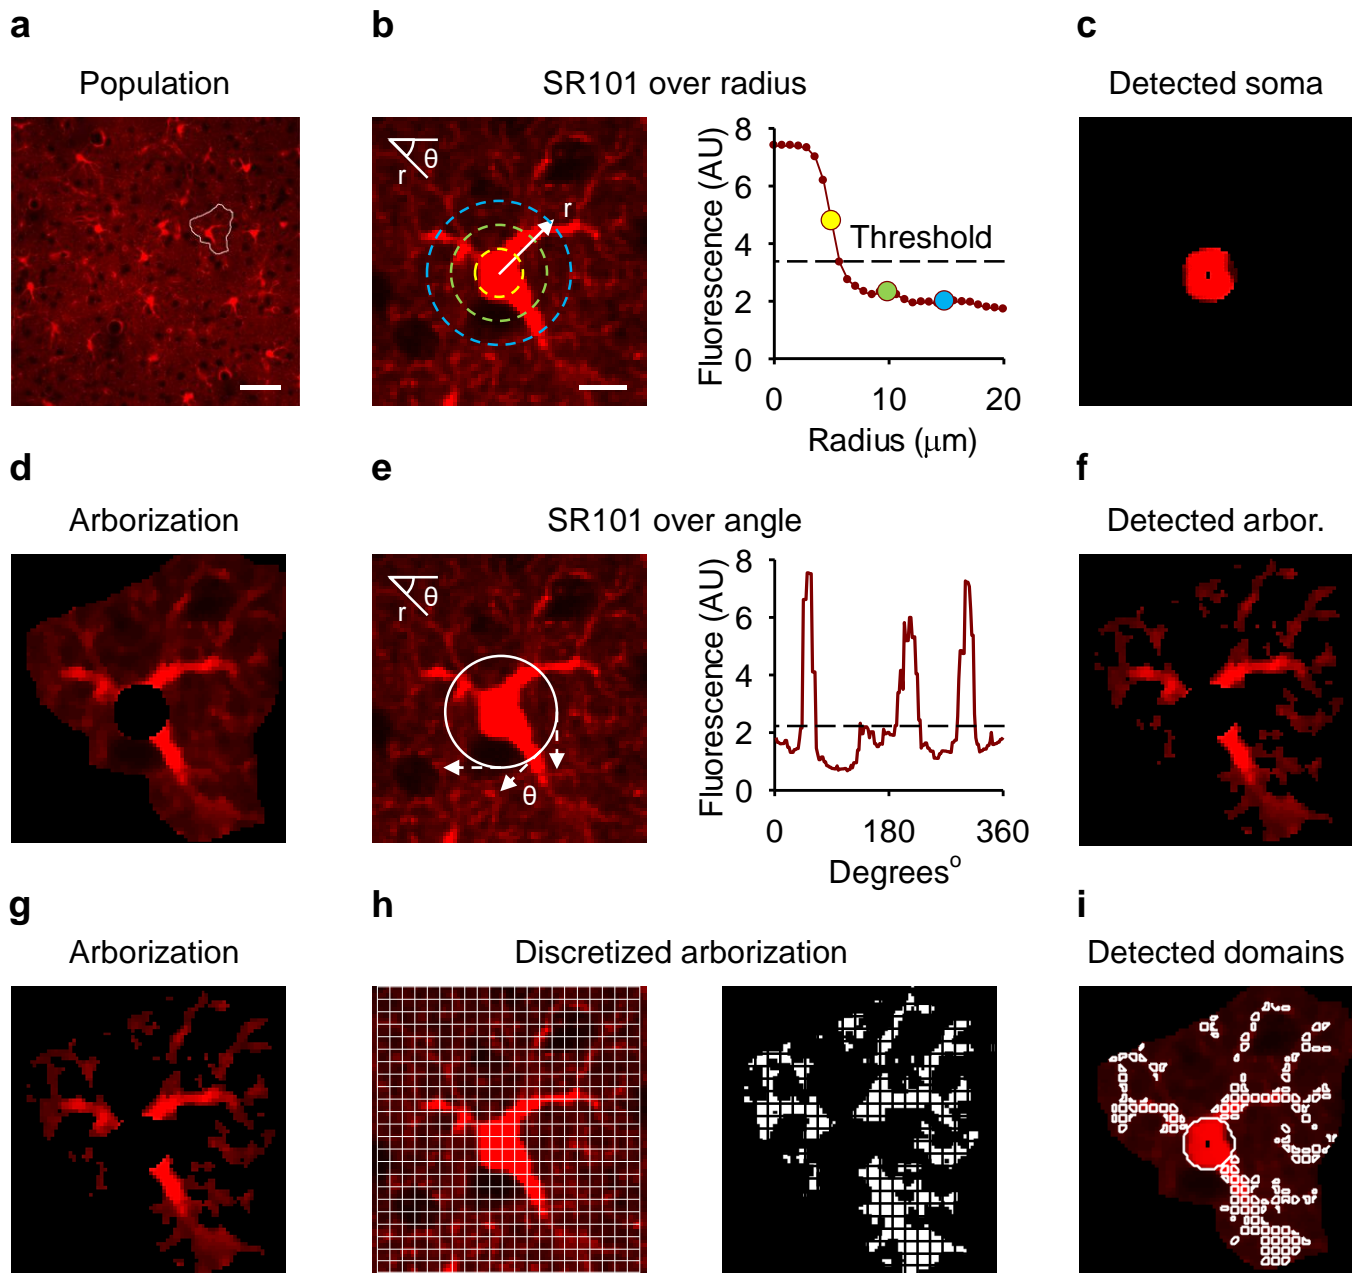

**Supplementary Fig. 8** Semi-automatic method for the segmentation of SR101 astrocyte morphology.

**a** SR101 stained astrocyte population with an outlined cell (white outline). Scale bar = 50  $\mu\text{m}$ . **b** Selected astrocyte placed in polar coordinates with radial distance ( $r$ ) and polar angle ( $\theta$ ) to assess the radius of the soma (left; scale bar = 10  $\mu\text{m}$ ) and the average fluorescence of circles centered on the astrocyte soma as radius is extended outward (right) with the threshold = 50% reduction in fluorescence (dashed line). Yellow, green and blue dots on the curve correspond to the average fluorescence of the respectively colored circles over the astrocyte. **c** Resulting image of the isolated soma. **d** Astrocyte in **b** sans soma. **e** Selected astrocyte placed in polar coordinates with overlaid circle to assess structural fluorescence and the fluorescence vs. angle (right) with the threshold = 0.25 times the standard deviation + median fluorescence (dashed line). Note the neuron at  $90^\circ$  corresponding to a low SR101 fluorescence. **f** and **g** Resulting image of the isolated arborization. **h** Grid of 3  $\mu\text{m}$  x 3  $\mu\text{m}$  squares over the astrocyte (left) and the discretized segmented arborization showing discrete regions of interest (ROI) (right). **i** Resulting ROIs labeling the microdomains and soma. This example is representative of over 1000 ROIs.

|                                         | Low (0-1Hz) | theta (4-7 Hz) | alpha (8-12Hz) | beta (13-30Hz) |
|-----------------------------------------|-------------|----------------|----------------|----------------|
| $D_{\min}$ (dB)                         | n.a.        | n.a.           | 14.4           | 9.5            |
| $D_{\max}$ (dB)                         | n.a.        | n.a.           | 21.2           | 15.8           |
| $D_{\text{slope}}$ ( $\text{s}^{-1}$ )  | n.a.        | n.a.           | 1.7            | 0.6            |
| $D_{50}$ (s)                            | n.a.        | n.a.           | 5.0            | 4.0            |
| $F_{\min}$ (dB)                         | n.a.        | n.a.           | 14.4           | 9.5            |
| $F_{\max}$ (dB)                         | n.a.        | n.a.           | 22.3           | 18.0           |
| $F_{\text{slope}}$ ( $\text{Hz}^{-1}$ ) | n.a.        | n.a.           | 3.0            | 1.5            |
| $F_{50}$ (Hz)                           | n.a.        | n.a.           | 0.8            | 1.1            |
| $I_{\min}$ (dB)                         | n.a.        | n.a.           | 14.4           | 9.5            |
| $I_{\max}$ (dB)                         | n.a.        | n.a.           | 21.8           | 18.2           |
| $I_{\text{slope}}$ ( $\text{mA}^{-1}$ ) | n.a.        | n.a.           | 2.8            | 1.7            |
| $I_{50}$ (mA)                           | n.a.        | n.a.           | 1.1            | 1.6            |

**Supplementary Table 1** Fitting parameters of ECoG frequency activity to eq. [2].

|                                        | Wildtype | DREADDs | IP <sub>3</sub> R2 <sup>-/-</sup> |
|----------------------------------------|----------|---------|-----------------------------------|
| D <sub>min</sub> (dB)                  | 3.2      | 1.0     | 8.4                               |
| D <sub>max</sub> (dB)                  | 9.4      | 5.6     | 10.8                              |
| D <sub>slope</sub> (s <sup>-1</sup> )  | 0.5      | 1.9     | 1.6                               |
| D <sub>50</sub> (s)                    | 3.8      | 4.6     | 4.9                               |
| F <sub>min</sub> (dB)                  | 3.2      | 1.0     | 8.4                               |
| F <sub>max</sub> (dB)                  | 12.0     | 6.9     | 14.6                              |
| F <sub>slope</sub> (Hz <sup>-1</sup> ) | 1.4      | 2.0     | 1.0                               |
| F <sub>50</sub> (Hz)                   | 1.1      | 0.9     | 2.7                               |
| I <sub>min</sub> (dB)                  | 3.2      | 1.0     | 8.4                               |
| I <sub>max</sub> (dB)                  | 12.8     | 7.2     | 13.3                              |
| I <sub>slope</sub> (mA <sup>-1</sup> ) | 1.4      | 2.5     | 1.1                               |
| I <sub>50</sub> (mA)                   | 1.7      | 1.2     | 2.0                               |

**Supplementary Table 2** Fitting parameters to eq. [2] of ECoG gamma activity in wildtype mice, CNO activation of astrocytes expressing DREADDs, and IP3R2<sup>-/-</sup> mice.
